# Supplementary material
Source: PubMed Central journal article supplement (PMC3567273)
Supplement: mmc1.pdf [file mmc1.pdf]

## Supplemental Data

### Ancient Substructure in Early mtDNA

#### Lineages of Southern Africa

Chiara Barbieri, Mário Vicente, Jorge Rocha, Sununguko W. Mpoloka, Mark Stoneking, and Brigitte Pakendorf

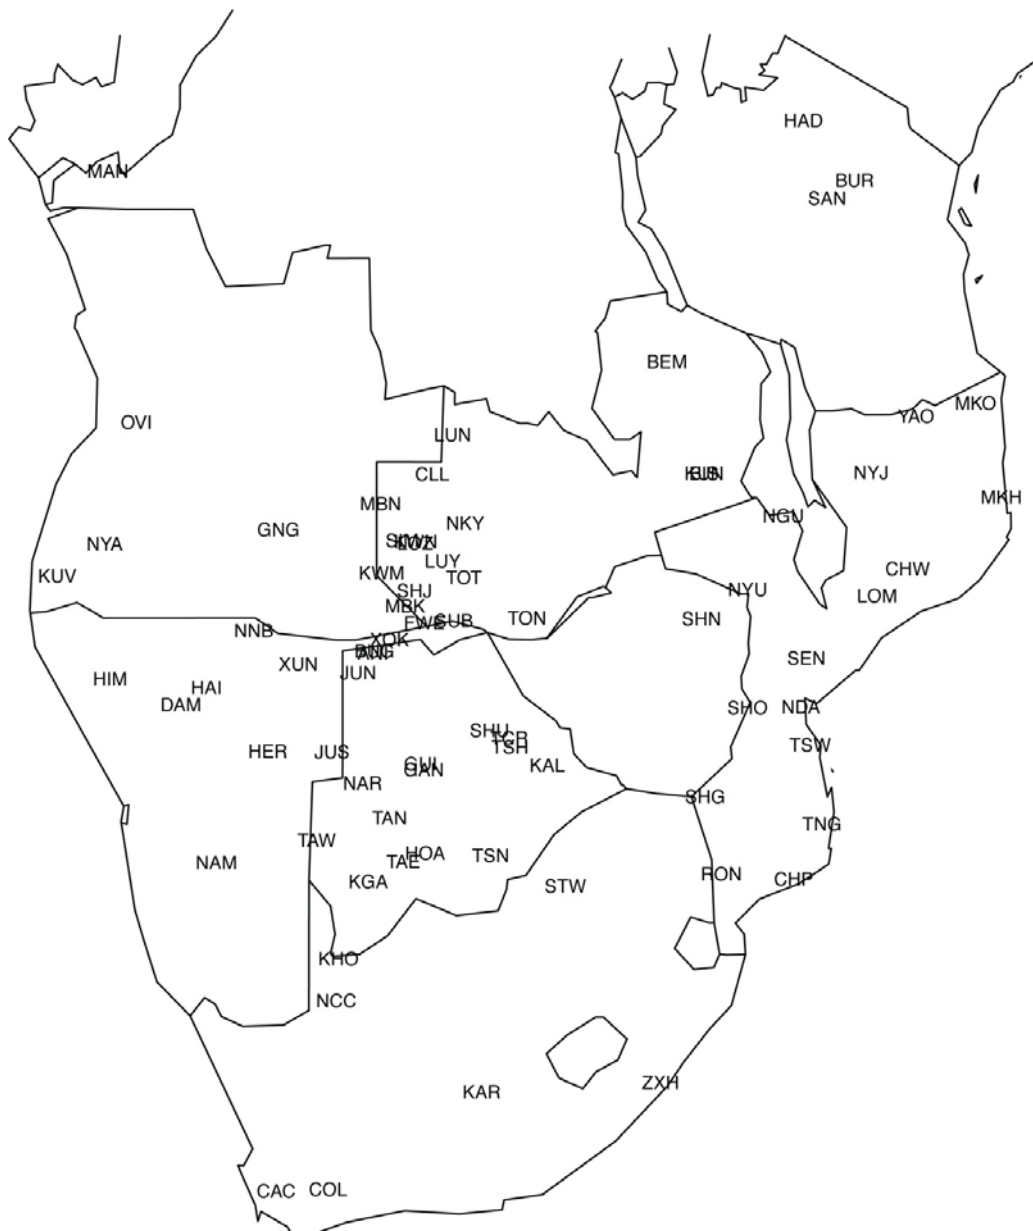

**Figure S1: Map of approximate locations of the populations included in the surfer map (Figure 1 in the main text).**

Population codes as indicated in Supplementary Table 1.

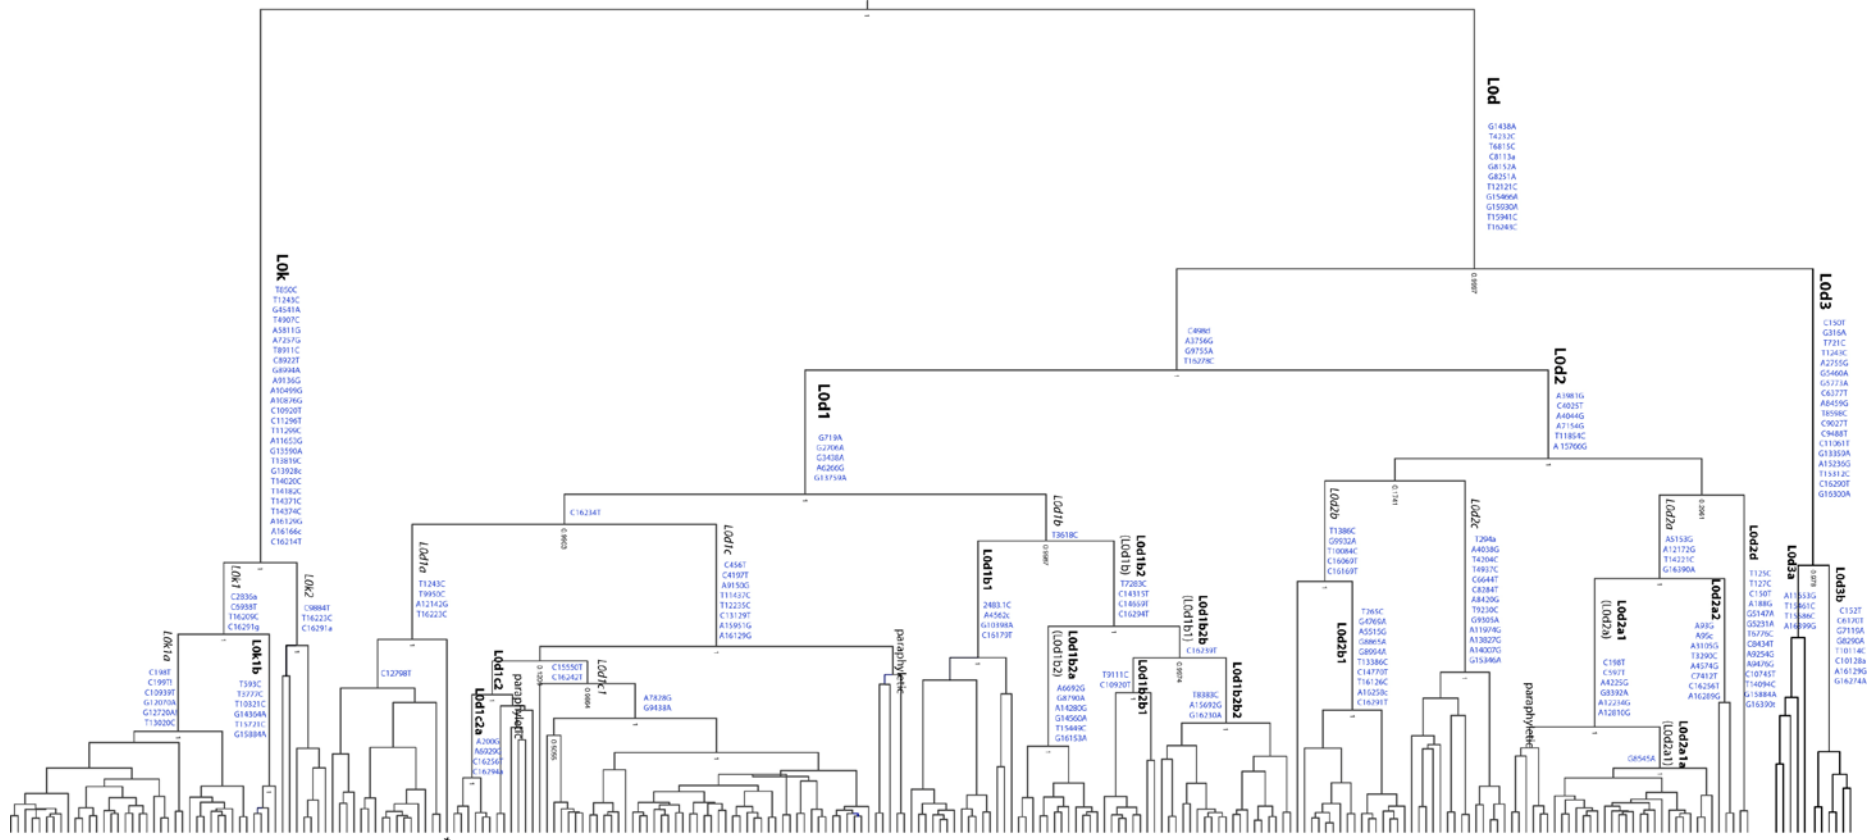

**Figure S2: Tree of the 254 unique haplotypes of the dataset.**

The tree is based on full sequences, without a time scale, and includes the major branches L0k, L0d1, L0d2 and L0d3. Sub-branches that have not changed are labeled in italic font; new branches defined here are labeled in bold font. When previously defined branches have to be renamed, the older label is indicated in brackets. The posterior probabilities associated with major nodes are shown. Mutations defining branches are shown in blue font: transversions are indicated with lowercase, and back mutations to an ancestral state are indicated with an exclamation mark (!). The individual marked with an asterisk is mentioned in the note about positions 199 and 16266 in Supplementary Table 3.

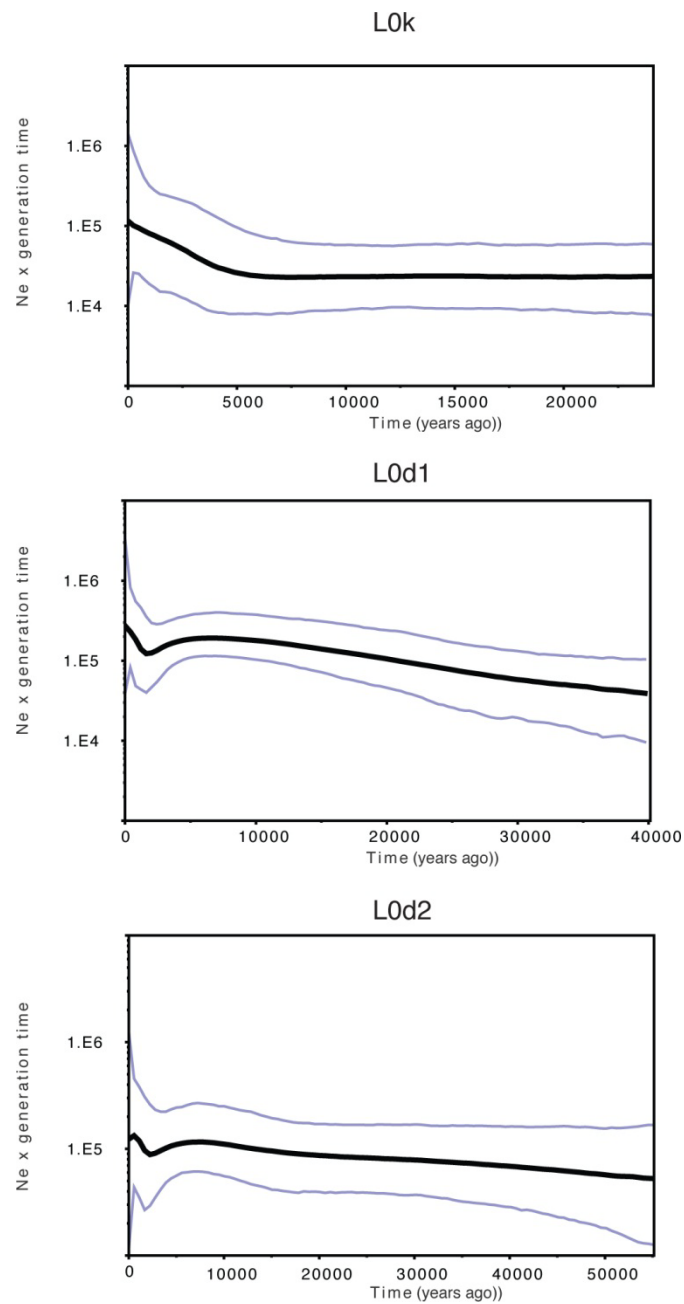

**Figure S3: Bayesian Skyline Plots (BSP) of the L0k, L0d1 and L0d2 haplogroups.**

The BSPs are based on the mtDNA coding region, estimated with 10 million iterations. The y axis for each plot is the product of the effective population size and the generation time and the x axis shows time using a linear relaxed clock with the substitution rate of  $1.26 \times 10^{-8}$  per site per year.



|                |     |              |              |            |             |     |             |             |      |      |     |      |     |     |                                       |
|----------------|-----|--------------|--------------|------------|-------------|-----|-------------|-------------|------|------|-----|------|-----|-----|---------------------------------------|
| Ovimbundu      | OVI | Angola       | Bantu        | 14.915771  | -11.888853  | 60  | <b>3.3</b>  | <b>1.6</b>  | 1.7  | 1.7  | 0.0 | 1.7  | 0.0 | 0.0 | PRESENT STUDY                         |
| Anikhoë        | ANI | Botswana     | Khoë         | 21.8850954 | -18.3734521 | 18  | <b>44.4</b> | <b>22.2</b> | 44.4 | 0.0  | 0.0 | 22.2 | 0.0 | 0.0 | PRESENT STUDY                         |
| Xokhwe         | XOK | Botswana     | Khoë         | 22.3761    | -17.9957    | 17  | <b>17.6</b> | <b>11.8</b> | 17.6 | 0.0  | 0.0 | 11.8 | 0.0 | 0.0 | PRESENT STUDY                         |
| Bugakhoe       | BUG | Botswana     | Khoë         | 21.9367    | -18.3219    | 14  | <b>42.9</b> | <b>28.6</b> | 42.9 | 0.0  | 0.0 | 28.6 | 0.0 | 0.0 | PRESENT STUDY                         |
| Naro           | NAR | Botswana     | Khoë         | 21.5840541 | -22.0320817 | 35  | <b>77.1</b> | <b>17.1</b> | 51.4 | 25.7 | 0.0 | 17.1 | 0.0 | 0.0 | PRESENT STUDY                         |
| G  ana         | GAN | Botswana     | Khoë         | 23.3889    | -21.6523    | 15  | <b>93.3</b> | <b>6.7</b>  | 80.0 | 13.3 | 0.0 | 6.7  | 0.0 | 0.0 | PRESENT STUDY                         |
| G ui           | GUI | Botswana     | Khoë         | 23.2946698 | -21.486584  | 31  | <b>93.5</b> | <b>3.2</b>  | 51.6 | 41.9 | 0.0 | 3.2  | 0.0 | 0.0 | PRESENT STUDY                         |
| Hai  om        | HAI | Namibia      | Khoë         | 16.9694944 | -19.3450768 | 51  | <b>68.6</b> | <b>13.7</b> | 39.2 | 27.5 | 2.0 | 13.7 | 0.0 | 0.0 | PRESENT STUDY                         |
| Nama           | NAM | Namibia      | Khoë         | 17.2608889 | -24.2660935 | 29  | <b>79.3</b> | <b>3.4</b>  | 37.9 | 34.5 | 6.9 | 0.0  | 3.4 | 0.0 | PRESENT STUDY                         |
| Damara         | DAM | Namibia      | Khoë         | 16.2257392 | -19.8301838 | 38  | <b>13.2</b> | <b>0</b>    | 10.5 | 2.6  | 0.0 | 0.0  | 0.0 | 0.0 | PRESENT STUDY                         |
| Shua           | SHU | Botswana     | Khoë         | 25.3321307 | -20.5502369 | 42  | <b>35.7</b> | <b>2.4</b>  | 35.7 | 0.0  | 0.0 | 2.4  | 0.0 | 0.0 | PRESENT STUDY                         |
| TcireTcire     | TCR | Botswana     | Khoë         | 25.9166477 | -20.7658488 | 12  | <b>50</b>   | <b>16.7</b> | 41.7 | 8.3  | 0.0 | 16.7 | 0.0 | 0.0 | PRESENT STUDY                         |
| Tshwa          | TSH | Botswana     | Khoë         | 25.9365757 | -21.0249347 | 22  | <b>54.5</b> | <b>0</b>    | 50.0 | 4.5  | 0.0 | 0.0  | 0.0 | 0.0 | PRESENT STUDY                         |
| †Hoan          | HOA | Botswana     | K'xa         | 23.4351167 | -23.9989176 | 13  | <b>100</b>  | <b>0</b>    | 92.3 | 7.7  | 0.0 | 0.0  | 0.0 | 0.0 | PRESENT STUDY                         |
| !Xuun          | XUN | Botswana     | K'xa         | 19.6826306 | -18.6907202 | 27  | <b>55.5</b> | <b>33.3</b> | 44.4 | 11.1 | 0.0 | 33.3 | 0.0 | 0.0 | PRESENT STUDY                         |
| Ju 'hoan North | JUN | Botswana     | K'xa         | 21.4524476 | -18.9372569 | 40  | <b>72.5</b> | <b>22.5</b> | 50.0 | 22.5 | 0.0 | 22.5 | 0.0 | 0.0 | PRESENT STUDY                         |
| Ju 'hoan South | JUS | Botswana     | K'xa         | 20.6815392 | -21.151918  | 44  | <b>70.5</b> | <b>25</b>   | 50.0 | 20.5 | 0.0 | 25.0 | 0.0 | 0.0 | PRESENT STUDY                         |
| Taa East       | TAE | Botswana     | Tuu          | 22.8206545 | -24.2365162 | 30  | <b>100</b>  | <b>0</b>    | 46.7 | 53.3 | 0.0 | 0.0  | 0.0 | 0.0 | PRESENT STUDY                         |
| Taa North      | TAN | Botswana     | Tuu          | 22.4158579 | -23.0145647 | 25  | <b>84</b>   | <b>16</b>   | 68.0 | 16.0 | 0.0 | 16.0 | 0.0 | 0.0 | PRESENT STUDY                         |
| Taa West       | TAW | Botswana     | Tuu          | 20.2727412 | -23.639938  | 31  | <b>74.2</b> | <b>22.6</b> | 51.6 | 22.6 | 0.0 | 22.6 | 0.0 | 0.0 | PRESENT STUDY                         |
| Shona          | SHN | Zimbabwe     | Bantu        | 31.593017  | -17.413546  | 59  | <b>1.7</b>  | <b>1.7</b>  |      |      |     |      |     |     | Castrì et al. 2009                    |
| Kunda          | KUN | Zambia       | Bantu        | 31.671753  | -13.325485  | 36  | <b>2.8</b>  | <b>0</b>    |      |      |     |      |     |     | De Filippo et al. 2010                |
| Bisa           | BIS | Zambia       | Bantu        | 31.67175   | -13.325483  | 46  | <b>0</b>    | <b>0</b>    |      |      |     |      |     |     | De Filippo et al. 2010, present study |
| SA Coloured    | COL | South Africa | Indoeuropean | 20.562744  | -33.449777  | 563 | <b>60</b>   | <b>0</b>    |      |      |     |      |     |     | Quintana-Murci et al. 2010            |
| Chopi          | CHP | Mozambique   | Bantu        | 34.317627  | -24.726875  | 27  | <b>0</b>    | <b>0</b>    |      |      |     |      |     |     | Salas et al. 2002                     |
| Chwabo         | CHW | Mozambique   | Bantu        | 37.679443  | -16.003576  | 20  | <b>0</b>    | <b>0</b>    |      |      |     |      |     |     | Salas et al. 2002                     |
| Lomwe          | LOM | Mozambique   | Bantu        | 36.778564  | -16.762468  | 20  | <b>0</b>    | <b>0</b>    |      |      |     |      |     |     | Salas et al. 2002                     |
| Makhwa         | MKH | Mozambique   | Bantu        | 40.447998  | -13.987376  | 20  | <b>0</b>    | <b>0</b>    |      |      |     |      |     |     | Salas et al. 2002                     |
| Makonde        | MKO | Mozambique   | Bantu        | 39.700927  | -11.350797  | 19  | <b>5.3</b>  | <b>0</b>    |      |      |     |      |     |     | Salas et al. 2002                     |
| Ndau           | NDA | Mozambique   | Bantu        | 34.537353  | -19.890723  | 19  | <b>30</b>   | <b>0</b>    |      |      |     |      |     |     | Salas et al. 2002                     |

|                        |     |              |                           |           |            |    |             |            |  |  |  |  |  |  |                        |
|------------------------|-----|--------------|---------------------------|-----------|------------|----|-------------|------------|--|--|--|--|--|--|------------------------|
| Nguni                  | NGU | Mozambique   | Bantu                     | 34.010009 | -14.51978  | 11 | <b>0</b>    | <b>0</b>   |  |  |  |  |  |  | Salas et al. 2002      |
| Nyanja                 | NYJ | Mozambique   | Bantu                     | 36.602783 | -13.304103 | 20 | <b>0</b>    | <b>0</b>   |  |  |  |  |  |  | Salas et al. 2002      |
| Nyungwe                | NYU | Mozambique   | Bantu                     | 32.955322 | -16.594081 | 20 | <b>0</b>    | <b>0</b>   |  |  |  |  |  |  | Salas et al. 2002      |
| Ronga                  | RON | Mozambique   | Bantu                     | 32.186279 | -24.58709  | 21 | <b>19</b>   | <b>0</b>   |  |  |  |  |  |  | Salas et al. 2002      |
| Sena                   | SEN | Mozambique   | Bantu                     | 34.691162 | -18.521283 | 21 | <b>0</b>    | <b>0</b>   |  |  |  |  |  |  | Salas et al. 2002      |
| Shangaan               | SHG | Mozambique   | Bantu                     | 31.70288  | -22.411029 | 22 | <b>4.5</b>  | <b>0</b>   |  |  |  |  |  |  | Salas et al. 2002      |
| Shona                  | SHO | Mozambique   | Bantu                     | 32.955322 | -19.911384 | 18 | <b>0</b>    | <b>0</b>   |  |  |  |  |  |  | Salas et al. 2002      |
| Tonga                  | TNG | Mozambique   | Bantu                     | 35.152587 | -23.180764 | 20 | <b>5</b>    | <b>0</b>   |  |  |  |  |  |  | Salas et al. 2002      |
| Tswa                   | TSW | Mozambique   | Bantu                     | 34.801025 | -20.96144  | 19 | <b>15.8</b> | <b>0</b>   |  |  |  |  |  |  | Salas et al. 2002      |
| Yao                    | YAO | Mozambique   | Bantu                     | 37.965087 | -11.716788 | 10 | <b>0</b>    | <b>0</b>   |  |  |  |  |  |  | Salas et al. 2002      |
| Karretjie Mense        | KAR | South Africa | Indoeuropean <sup>a</sup> | 25.101013 | -30.712638 | 30 | <b>100</b>  | <b>0</b>   |  |  |  |  |  |  | Schlebusch et al. 2011 |
| Cape Colured           | CAC | South Africa | Indoeuropean              | 19.037475 | -33.495598 | 20 | <b>45</b>   | <b>0</b>   |  |  |  |  |  |  | Schlebusch 2010        |
| Khomani                | KHO | South Africa | Tuu                       | 20.872192 | -26.971038 | 57 | <b>98.2</b> | <b>0</b>   |  |  |  |  |  |  | Schlebusch 2010        |
| Manyanga               | MAN | DRC          | Bantu                     | 14.058837 | -4.82826   | 14 | <b>0</b>    | <b>0</b>   |  |  |  |  |  |  | Schlebusch2010         |
| Northern Cape Coloured | NCC | South Africa | Indoeuropean              | 20.804443 | -28.149503 | 40 | <b>92.5</b> | <b>0</b>   |  |  |  |  |  |  | Schlebusch 2010        |
| Sotho Tswana           | STW | South Africa | Bantu                     | 27.572021 | -24.926295 | 22 | <b>22.7</b> | <b>0</b>   |  |  |  |  |  |  | Schlebusch 2010        |
| Zulu Xhosa             | ZXH | South Africa | Bantu                     | 30.384521 | -30.448674 | 36 | <b>44.4</b> | <b>2.8</b> |  |  |  |  |  |  | Schlebusch 2010        |
| Burunge                | BUR | Tanzania     | Cushitic                  | 36.119384 | -5.090944  | 38 | <b>3</b>    | <b>0</b>   |  |  |  |  |  |  | Tishkoff et al. 2007   |
| Hadza                  | HAD | Tanzania     | Khoisan (isolated)        | 34.603271 | -3.403758  | 79 | <b>0</b>    | <b>0</b>   |  |  |  |  |  |  | Tishkoff et al. 2007   |
| Sandawe                | SAN | Tanzania     | Khoisan (isolated)        | 35.306396 | -5.594118  | 82 | <b>5</b>    | <b>0</b>   |  |  |  |  |  |  | Tishkoff et al. 2007   |

<sup>a</sup> this population used to speak a Tuu language but has shifted to Afrikaans.

**Table S2: List of positions (numbered in accordance with the RSRs/rCRS) with missing data that were excluded from the analysis. Polymorphic sites are underlined.**

|              |
|--------------|
| <u>316</u>   |
| <u>1243</u>  |
| 3106         |
| 3492         |
| 3516         |
| <u>3981</u>  |
| <u>4232</u>  |
| <u>5515</u>  |
| <u>5936</u>  |
| 6716         |
| <u>6938</u>  |
| 7412         |
| <u>8563</u>  |
| <u>10550</u> |
| 10589        |
| 11854        |
| <u>13020</u> |
| 13198        |
| <u>13386</u> |
| <u>14770</u> |
| <u>15530</u> |
| <u>15930</u> |
| <u>15941</u> |
| <u>16069</u> |
| <u>16093</u> |
| <u>16169</u> |
| <u>16212</u> |
| 16215        |
| <u>16230</u> |
| <u>16242</u> |
| <u>16243</u> |
| 16474        |

**Table S3: Notes on some of the haplogroup-defining mutations.**

| Mutation      | Remarks                                                                                                                                                                                                                                                                                                                                                                                                                                                                                                                                                                                                                                                                                                                                                                                                                                                                                                                                                                                                                                                                                                                                                                                                          |
|---------------|------------------------------------------------------------------------------------------------------------------------------------------------------------------------------------------------------------------------------------------------------------------------------------------------------------------------------------------------------------------------------------------------------------------------------------------------------------------------------------------------------------------------------------------------------------------------------------------------------------------------------------------------------------------------------------------------------------------------------------------------------------------------------------------------------------------------------------------------------------------------------------------------------------------------------------------------------------------------------------------------------------------------------------------------------------------------------------------------------------------------------------------------------------------------------------------------------------------|
| <b>C152T</b>  | This mutation defines L0d3b, but is also present in an individual belonging to L0d3a as well as being found sporadically in other branches of L0d and L0k.                                                                                                                                                                                                                                                                                                                                                                                                                                                                                                                                                                                                                                                                                                                                                                                                                                                                                                                                                                                                                                                       |
| <b>A188G</b>  | In Supplementary Figure 2, this is shown only for L0d2d; however, this mutation also occurs in nearly all the individuals belonging to L0d1b1, with only 2 exceptions.                                                                                                                                                                                                                                                                                                                                                                                                                                                                                                                                                                                                                                                                                                                                                                                                                                                                                                                                                                                                                                           |
| <b>C198T</b>  | In Supplementary Figure 2, this is shown for L0d2a1 and L0k1a; however, this mutation also defines a minor subbranch of L0d1c1 (rather than defining L0d1c1 as a whole, as previously thought).                                                                                                                                                                                                                                                                                                                                                                                                                                                                                                                                                                                                                                                                                                                                                                                                                                                                                                                                                                                                                  |
| <b>199</b>    | <p>The evolutionary pathway involving L0k cannot be resolved, since L0k2 and L0k1b carry a C at this position, while L0k1a carries a T, which is the state reconstructed for the RSRS. In Supplementary Figure 2 we show the C199T back mutation as defining L0k1a; however, with our dataset it is equally likely that two independent T-C transitions occurred on the branches leading to L0k2 and L0k1b, with L0k1a retaining the ancestral T.</p> <p>In addition, L0d1a carries a C at this position with the exception of three lineages not forming a clade. One of these is a deeply divergent lineage represented by only one individual from Botswana (indicated by an asterisk in Supplementary Figure 2); thus, one could postulate either three back mutations from the mutation defining L0d1a as a whole, or consider T199C a defining mutation only for the subclade L0d1a1, with two back mutations having occurred subsequently. Since C16266a is also missing in the divergent lineage (see below), one should perhaps consider both T199C and C16266a as mutations defining the subclade L0d1a1, with subsequent back mutations (C199T) or novel mutations (A16266G) in some individuals.</p> |
| <b>294</b>    | In Supplementary Figure 2, we show the T-A transversion defining L0d2c; in addition, a T-C transition defines a subbranch of L0d1c1.                                                                                                                                                                                                                                                                                                                                                                                                                                                                                                                                                                                                                                                                                                                                                                                                                                                                                                                                                                                                                                                                             |
| <b>A7828G</b> | Rather than defining branch L0d1c1 as a whole, as previously suggested, this is missing from one individual and thus defines only a subbranch, as shown in Supplementary Figure 2.                                                                                                                                                                                                                                                                                                                                                                                                                                                                                                                                                                                                                                                                                                                                                                                                                                                                                                                                                                                                                               |
| <b>C8922T</b> | This is found in L0k2, L0k1b, and several branches of L0k1a, but is missing from one subbranch of L0k1a. The most plausible reconstruction is that the transition occurred on the branch leading to L0k, as previously assumed,                                                                                                                                                                                                                                                                                                                                                                                                                                                                                                                                                                                                                                                                                                                                                                                                                                                                                                                                                                                  |
| <b>G8994A</b> | In Supplementary Figure 2, this is shown only for L0d2b1 and L0k; however, this mutation also defines a small subbranch of the paraphyletic branch of L0d1c.                                                                                                                                                                                                                                                                                                                                                                                                                                                                                                                                                                                                                                                                                                                                                                                                                                                                                                                                                                                                                                                     |
| <b>A9136G</b> | This mutation defining L0k mutates back to A in a subbranch of L0k2.                                                                                                                                                                                                                                                                                                                                                                                                                                                                                                                                                                                                                                                                                                                                                                                                                                                                                                                                                                                                                                                                                                                                             |
| <b>A9347G</b> | This mutation is at the root of haplogroup L0, but almost all of the L0k2 individuals present a back mutation at this site, with the exception of the sample from Yemen.                                                                                                                                                                                                                                                                                                                                                                                                                                                                                                                                                                                                                                                                                                                                                                                                                                                                                                                                                                                                                                         |



|                |                                                                                                                                                                                                                                                                                                                                                                                                                                                                                                                                                                                                                                                                                                                                                                                                                                                                                                                               |
|----------------|-------------------------------------------------------------------------------------------------------------------------------------------------------------------------------------------------------------------------------------------------------------------------------------------------------------------------------------------------------------------------------------------------------------------------------------------------------------------------------------------------------------------------------------------------------------------------------------------------------------------------------------------------------------------------------------------------------------------------------------------------------------------------------------------------------------------------------------------------------------------------------------------------------------------------------|
| <b>G9438A</b>  | Rather than defining branch L0d1c1 as a whole, as previously suggested, this is missing from one individual and thus defines only a subbranch, with a further back mutation to A9438G found in one sequence.                                                                                                                                                                                                                                                                                                                                                                                                                                                                                                                                                                                                                                                                                                                  |
| <b>A11653G</b> | This mutation defines L0k as well as L0d3a.                                                                                                                                                                                                                                                                                                                                                                                                                                                                                                                                                                                                                                                                                                                                                                                                                                                                                   |
| <b>C15550T</b> | Together with C16242T, this is the only mutation defining branch L0d1c1; A7828G and G9438A are missing from one divergent lineage and thus define only a subset of L0d1c1 (with a further back mutation to A9438G found in one sequence), while C198T defines an even smaller branch within L0d1c1.                                                                                                                                                                                                                                                                                                                                                                                                                                                                                                                                                                                                                           |
| <b>T15586C</b> | This mutation defining L0d3a mutates back to T in one individual of the same subbranch.                                                                                                                                                                                                                                                                                                                                                                                                                                                                                                                                                                                                                                                                                                                                                                                                                                       |
| <b>A16129G</b> | This mutation defines L0d1c, L0k and L0d3b, as well as a subbranch of L0d1b2a. Given the hypervariability of this position, it is not surprising that several back mutations to A occur in the tree – the most notable being a back mutation in the individual from Yemen whose sequence up to now was the only lineage known for L0k2. Therefore, A16129G was previously considered a mutation defining only L0k1; with our extended dataset we show that it defines all of L0k.                                                                                                                                                                                                                                                                                                                                                                                                                                             |
| <b>T16209C</b> | This mutation, which defines L0k1, also appears in a subbranch of L0d1a.                                                                                                                                                                                                                                                                                                                                                                                                                                                                                                                                                                                                                                                                                                                                                                                                                                                      |
| <b>C16242T</b> | Together with C15550T, this is the only mutation defining branch L0d1c1; A7828G and G9438A are missing from one divergent lineage and thus define only a subset of L0d1c1 (with a further back mutation to A9438G found in one sequence), while C198T defines an even smaller branch within L0d1c1.                                                                                                                                                                                                                                                                                                                                                                                                                                                                                                                                                                                                                           |
| <b>16266</b>   | Like the T-C transition at 199, C16266a is not found in all the sequences belonging to L0d1a; rather, four sequences carry a G at this position. Since one of these is the divergent lineage represented by an asterisk in Supplementary Figure 2 (as mentioned for position 199 above), one should perhaps consider both T199C and C16266a as mutations defining the subclade L0d1a1, with subsequent back mutations (C199T) or novel mutations (A16266G) in some individuals.                                                                                                                                                                                                                                                                                                                                                                                                                                               |
| <b>16291</b>   | While a C-T transition defines branch L0d2b1, it also defines a subbranch of the paraphyletic sister clade of L0d1c2.<br><br>Furthermore, L0k1 is defined by a G at this position, with a subsequent G to A transition on a subbranch of L0k1a; L0k2 carries an A at this position. While Phylotree ( <a href="http://www.phylotree.org/tree/subtree_L.htm">http://www.phylotree.org/tree/subtree_L.htm</a> , Build 15) reconstructs a C-G transversion for L0k as a whole and a G-A transition for L0k2, from the data available to us it appears impossible to decide whether a C-G or C-A transversion took place on the branch leading to L0k. Therefore, in Supplementary Figure 2 the mutations defining L0k1 and L0k2 are both listed as transversions, even though the actual evolutionary path would have involved just one transversion (on the branch leading to L0k) and one transition (on either L0k1 or L0k2). |
| <b>16294</b>   | While a C-T transition defines branch L0d1b2, and a C-A transversion defines branch L0d1c2a, the paraphyletic sister branch of L0d1c2a is defined by a G at this position, with the exception of one individual who carries an A.                                                                                                                                                                                                                                                                                                                                                                                                                                                                                                                                                                                                                                                                                             |
| <b>A16300G</b> | This mutation, which defines L0d3, mutates back to A in two individuals of branch L0d3b                                                                                                                                                                                                                                                                                                                                                                                                                                                                                                                                                                                                                                                                                                                                                                                                                                       |

The mutations are numbered in accordance with the RSRs/rCRS sequence.

Supplemental References:

Barbieri, C., Butthof, A., Bostoen, K., and Pakendorf, B. (2012). Genetic perspectives on the origin of clicks in Bantu languages from southwestern Zambia. *Eur J Hum Genet*. doi: 10.1038/ejhg.2012.192. Aug 29. [Epub ahead of print]

Castrì, L., Tofanelli, S., Garagnani, P., Bini, C., Fosella, X., Pelotti, S., Paoli, G., Pettener, D., and Luiselli, D. (2009). mtDNA variability in two Bantu-speaking populations (Shona and Hutu) from Eastern Africa: implications for peopling and migration patterns in sub-Saharan Africa. *Am J Phys Anthropol* 140, 302-311.

de Filippo, C., Heyn, P., Barham, L., Stoneking, M., and Pakendorf, B. (2010). Genetic perspectives on forager-farmer interaction in the Luangwa valley of Zambia. *Am J Phys Anthropol* 141, 382-394.

Quintana-Murci, L., Harmant, C., Quach, H., Balanovsky, O., Zaporozhchenko, V., Bormans, C., van Helden, P.D., Hoal, E.G., and Behar, D.M. (2010). Strong Maternal Khoisan Contribution to the South African Coloured Population: A Case of Gender-Biased Admixture. *Am J Hum Genet* 86, 611-620.

Schlebusch, C.M., de Jongh, M., and Soodyall, H. (2011). Different contributions of ancient mitochondrial and Y-chromosomal lineages in 'Karretjie people' of the Great Karoo in South Africa. *J Hum Genet* 56, 623-630.

Schlebusch, C.M. (2010). Genetic variation in Khoisan-speaking populations from southern Africa. PhD thesis, University of the Witwatersrand, Johannesburg.

Tishkoff, S.A., Gonder, M.K., Henn, B.M., Mortensen, H., Knight, A., Gignoux, C., Fernandopulle, N., Lema, G., Nyambo, T.B., Ramakrishnan, U., et al. (2007). History of click-speaking Populations of Africa inferred from mtDNA and Y chromosome genetic variation. *Mol Biol Evol* 24, 2180-2195
